# Supplementary material
Source: PubMed Central journal article supplement (PMC2999480)
Supplement: me.2010-0203_1.pdf [file me.2010-0203_1.pdf]

Anterior

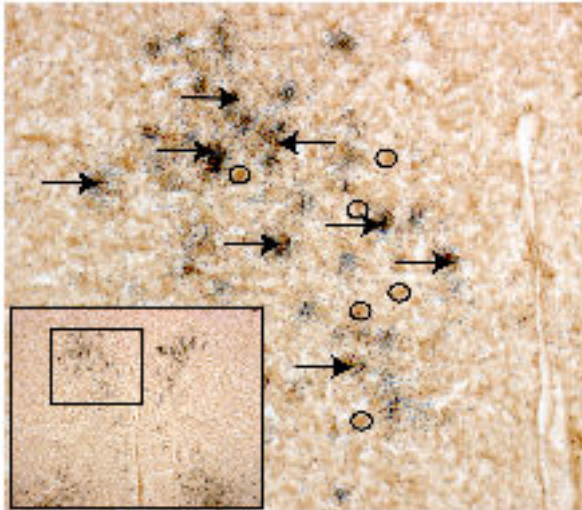

Mid

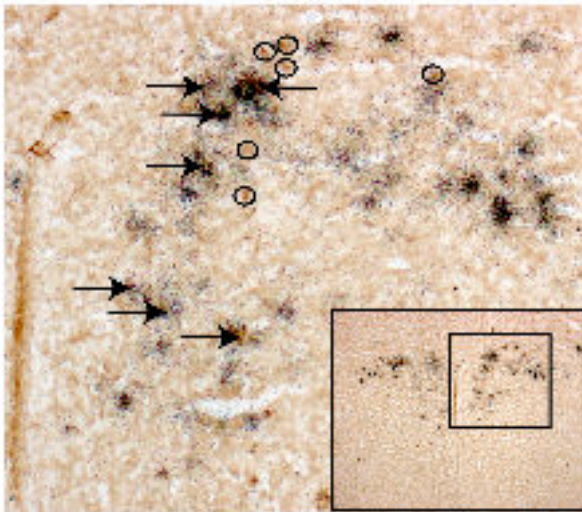

Posterior

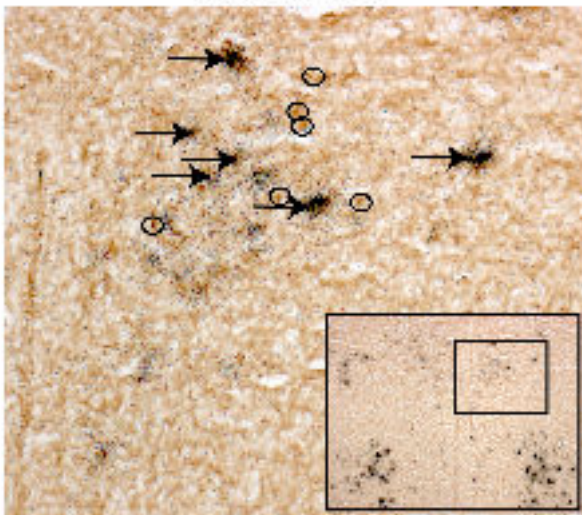

**Figure 1:** Colocalization of GFP

immunostaining and TRH mRNA in the anterior, mid and posterior regions of the PVN containing hypophysiotropic TRH neurons. Dual-label immunohistochemistry/*in situ* hybridization was performed on TRH-Cre x R26-GFP mice. Images detail GFP-immunostaining and TRH mRNA in regions defined in Table 1, anterior, mid and posterior regions of the PVH containing hypophysiotropic TRH neurons. Circles indicate GFP-only staining (brown). Arrows indicate colocalization of GFP (brown) and TRH mRNA (black grains). Magnification: 20X (highlighted area of 10X inset).

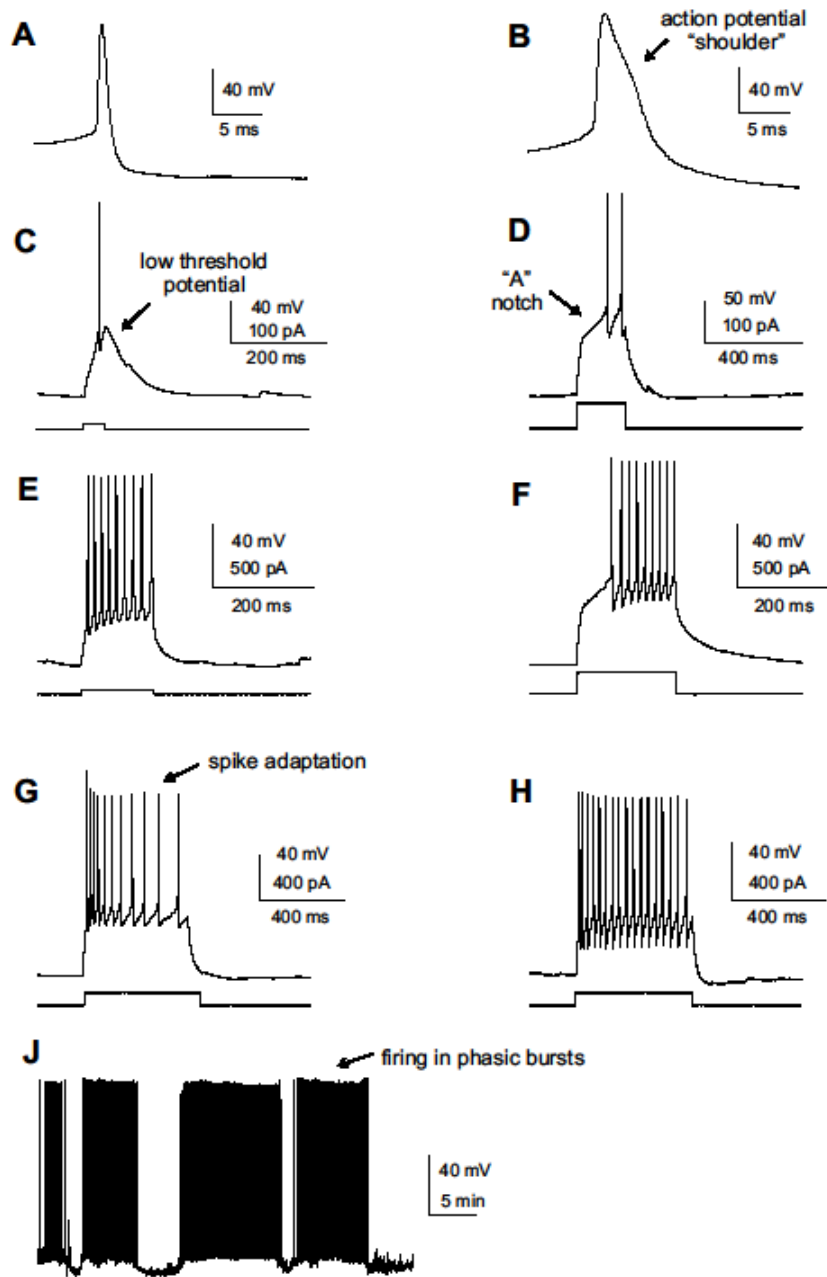

Figure S2

**Figure 2:** Electrogenic membrane properties of TRH-expressing neurons in PVN. A) The width of action potential recorded from a parvocellular neuroendocrine (type II) cell is narrower than that from a magnocellular neurosecretory (type I) neuron that is associated with a  $\text{Ca}^{2+}$ -dependent action potential “shoulder” (B). C) a brief (~40 ms duration) positive current (~20-50 pA) pulse generates a low threshold (~ -40 mV) transient depolarizing potential lasting tens of milliseconds. Its expression, observed mainly in type III pre-autonomic neurons, can be associated with superimposed firing of action potentials. However, in type I magnocellular neurons such a positive current pulse applied from low (< -70 mV) membrane potentials was associated with delayed onset of action potential firing, the “A” notch, D. E & F panels demonstrate trains of action potentials respectively without and with expression of the “A” notch. G, indicates frequency adaptation of firing in a train of action potentials, mostly observed in type II parvocellular neuroendocrine compared with type I magnocellular neurosecretory neurons that did not express any frequency adaptation to firing, H. J) Spontaneously firing action potentials in phasic bursts, a property observed in Type I neuroendocrine magnocellular neurons.

**Table 1:** Electrogenic membrane properties of TRH -expressing neurons in mouse PVN.

| Characteristics                                      | n value | Percentage of TRH neurons exhibiting property | Indication |
|------------------------------------------------------|---------|-----------------------------------------------|------------|
| "A" notch                                            | 34      | 35%                                           | I          |
| Action potential "shoulder", >1.1 ms at half-peak    | 34      | 35%                                           | I          |
| Firing phasic bursts                                 | 17      | 35%                                           | I          |
| Low threshold potentials (bursting and non-bursting) | 34      | 13%                                           | III & II   |
| Action potential frequency adaptation                | 34      | 53%                                           | II & III   |

**Table 2:** Comparison of responses of type I and II PVN neurons to the peptides.

|                                            | Type I          |                 | p value  | n= | Type II         |                 | p value  | n= |
|--------------------------------------------|-----------------|-----------------|----------|----|-----------------|-----------------|----------|----|
|                                            | Control         | peptide         |          |    | control         | peptide         |          |    |
| $\alpha$ -MSH-induced firing activity (Hz) | 1.8 $\pm$ 0.3   | 3.2 $\pm$ 0.5   | <0.01    | 19 | 1.6 $\pm$ 0.4   | 2.9 $\pm$ 0.6   | P<0.001  | 16 |
| $\alpha$ -MSH-induced depolarization (mV)  | -45.9 $\pm$ 1.6 | -39.6 $\pm$ 1.1 | <0.0001  | 19 | -47.9 $\pm$ 1.6 | -41.4 $\pm$ 1.3 | <0.0001  | 16 |
| NPY-induced inhibition (Hz)                | 4.3 $\pm$ 1.1   | 1.3 $\pm$ 0.9   | <0.05    | 5  | 3.9 $\pm$ 1.5   | 0.5 $\pm$ 0.2   | <0.05    | 8  |
| NPY-induced hyperpolarization (mV)         | -45.0 $\pm$ 2.1 | -52.6 $\pm$ 2.3 | P<0.05   | 5  | -46.6 $\pm$ 2.1 | -56.0 $\pm$ 2.1 | <0.001   | 8  |
| leptin-induced firing activity (Hz)        | 0.9 $\pm$ 0.2   | 3.5 $\pm$ 0.6   | < 0.0001 | 21 | 1.1 $\pm$ 0.2   | 2.6 $\pm$ 0.3   | < 0.0001 | 12 |
| leptin-induced depolarization (mV)         | -51.0 $\pm$ 1.7 | -40.0 $\pm$ 3.6 | <0.005   | 21 | -52.1 $\pm$ 1.8 | -44.7 $\pm$ 1.5 | < 0.0001 | 12 |
